# Supplementary material for: The impact of gender, puberty, and pregnancy in patients with POLG disease
Source: PubMed Central journal article supplement (PMC7545595; doi:10.1002/acn3.51199), 2020-09-18
Supplement: ACN3-7-2019-s002.pdf [file ACN3-7-2019-s002.pdf]

Supplementary file 2. Major clinical features stratified according to the gender and puberty-onset.

|                    | All            | All Males    | All females  | Onset prior to 12 years males | Onset prior 12 years females | Onset after 12 years males | Onset after 12 years females |
|--------------------|----------------|--------------|--------------|-------------------------------|------------------------------|----------------------------|------------------------------|
| <b>Seizures</b>    | 69%(n=107/155) | 70%(n=53/76) | 68%(n=54/79) | 57%(n=35/62)                  | 43%(n=27/62)                 | 41%(n=18/44)               | 59%(n=26/44)                 |
| <b>SLE</b>         | 37%(n=52/139)  | 34%(n=23/67) | 40%(n=29/72) | 73%(n=16/22)                  | 27%(n=6/22)                  | 27%(n=7/26)                | 73%(n=19/26)                 |
| <b>Ataxia</b>      | 63%(n=87/138)  | 62%(n=41/66) | 64%(n=46/72) | 59%(n=13/22)                  | 41%(n=9/22)                  | 44%(n=25/57)               | 56%(n=32/57)                 |
| <b>PNP</b>         | 53%(n=65/123)  | 52%(n=31/60) | 54%(n=34/63) | 50%(n=4/8)                    | 50%(n=4/8)                   | 50%(n=26/52)               | 50%(n=26/52)                 |
| <b>Hepatopathy</b> | 64%(n=96/151)  | 63%(n=46/73) | 64%(n=50/78) | 54%(n=32/59)                  | 46%(n=27/59)                 | 36%(n=10/28)               | 64%(n=18/28)                 |
| <b>Ptosis</b>      | 34%(n=51/148)  | 38%(n=28/73) | 31%(n=23/75) | 50%(n=4/8)                    | 50%(n=4/8)                   | 55%(n=22/40)               | 45%(n=18/40)                 |
| <b>PEO</b>         | 39%(n=56/144)  | 41%(n=29/71) | 37%(27/73)   | 25%(n=1/4)                    | 75%(n=3/4)                   | 54%(n=26/48)               | 46%(n=22/48)                 |

SLE: stroke like episodes, PNP: peripheral Neuropathy, PEO: progressive external ophthalmoplegia.
